# Supplementary material for: Differential genetic and functional background in inflammatory bowel disease phenotypes of a Greek population: a systems bioinformatics approach
Source: Gut Pathog. 2019 Jun 15;11:31. doi: 10.1186/s13099-019-0312-y (PMC6570833; doi:10.1186/s13099-019-0312-y)
Supplement: Supplementary file 2 — Additional file 2. The ranked proteins associated with each IBD phenotype and sub-phenotype after centrality analysis, in their respective sheets. [file 13099_2019_312_MOESM2_ESM.xlsx]

## Sheet: Description
This excel file contains the ranked proteins associated with each IBD phenotype and sub-phenotype after centrality analysis, in their respective sheets

## Sheet: CD
	DEGREE	0.2		BOTTLE	0.5		LATORA	0.3			COMBINED		SORTED VALUES
ATG12	0.166667		ATG12	0		ATG12	0.484346			ATG12	0.178637	TLR4	0.975674
ATG16L1	0.25		ATG16L1	0.125		ATG16L1	0.712841			ATG16L1	0.326352	SRC	0.942914
ATG3	0.166667		ATG3	0		ATG3	0.484126			ATG3	0.178571	NOD2	0.91875
ATG5	0.291667		ATG5	0.53125		ATG5	0.827235			ATG5	0.572129	MYD88	0.841505
ATG7	0.333333		ATG7	0.25		ATG7	0.736721			ATG7	0.412683	IL6	0.834861
BIRC2	0.583333		BIRC2	0.125		BIRC2	0.728416			BIRC2	0.397692	STAT3	0.685235
BIRC3	0.625		BIRC3	0.09375		BIRC3	0.79863			BIRC3	0.411464	IKBKB	0.599599
CD289	0.541667		CD289	0.25		CD289	0.92142			CD289	0.509759	ATG5	0.572129
IKBKB	0.791667		IKBKB	0.375		IKBKB	0.845885			IKBKB	0.599599	UBE2N	0.562801
IKBKG	0.75		IKBKG	0.1875		IKBKG	0.852195			IKBKG	0.499409	UBE2V1	0.54728
IL6	0.833333		IL6	0.75		IL6	0.977316			IL6	0.834861	CD289	0.509759
IL6R	0.333333		IL6R	0		IL6R	0.745397			IL6R	0.290286	TICAM1	0.508258
IRAK4	0.625		IRAK4	0.15625		IRAK4	0.931712			IRAK4	0.482639	TRAF6	0.507151
JAK1	0.416667		JAK1	0.03125		JAK1	0.771039			JAK1	0.33027	IKBKG	0.499409
JAK2	0.416667		JAK2	0.03125		JAK2	0.769463			JAK2	0.329797	IRAK4	0.482639
LY96	0.666667		LY96	0.0625		LY96	0.797027			LY96	0.403692	STAT5A	0.453975
MAP3K7	0.625		MAP3K7	0.09375		MAP3K7	0.745978			MAP3K7	0.395669	TRAF3	0.441736
MYD88	0.958333		MYD88	0.71875		MYD88	0.968211			MYD88	0.841505	STAT5B	0.43922
NCOA1	0.208333		NCOA1	0.28125		NCOA1	0.676287			NCOA1	0.385178	ATG7	0.412683
NOD2	0.75		NOD2	0.9375		NOD2	1			NOD2	0.91875	BIRC3	0.411464
POU2F1	0.0833333		POU2F1	0.125		POU2F1	0.626203			POU2F1	0.267028	LY96	0.403692
PPARG	0.291667		PPARG	0.03125		PPARG	0.818645			PPARG	0.319552	BIRC2	0.397692
SLC22A4	0.0416667		SLC22A4	0.09375		SLC22A4	0.679559			SLC22A4	0.259076	MAP3K7	0.395669
SRC	0.75		SRC	1		SRC	0.97638			SRC	0.942914	TRAF1	0.392718
STAT3	0.666667		STAT3	0.5625		STAT3	0.902172			STAT3	0.685235	NCOA1	0.385178
STAT5A	0.5		STAT5A	0.21875		STAT5A	0.815333			STAT5A	0.453975	JAK1	0.33027
STAT5B	0.458333		STAT5B	0.21875		STAT5B	0.793928			STAT5B	0.43922	JAK2	0.329797
STX7	0.0833333		STX7	0.03125		STX7	0.371796			STX7	0.143831	ATG16L1	0.326352
STX8	0.0833333		STX8	0.03125		STX8	0.37102			STX8	0.143598	PPARG	0.319552
TICAM1	0.625		TICAM1	0.28125		TICAM1	0.808776			TICAM1	0.508258	IL6R	0.290286
TLR4	1		TLR4	1		TLR4	0.918915			TLR4	0.975674	POU2F1	0.267028
TRAF1	0.416667		TRAF1	0.09375		TRAF1	0.875031			TRAF1	0.392718	SLC22A4	0.259076
TRAF3	0.666667		TRAF3	0.09375		TRAF3	0.87176			TRAF3	0.441736	VTI1B	0.253683
TRAF6	0.75		TRAF6	0.25		TRAF6	0.773836			TRAF6	0.507151	UBE2V2	0.247394
UBE2N	0.708333		UBE2N	0.375		UBE2N	0.778782			UBE2N	0.562801	ATG12	0.178637
UBE2V1	0.625		UBE2V1	0.375		UBE2V1	0.782602			UBE2V1	0.54728	ATG3	0.178571
UBE2V2	0.125		UBE2V2	0.15625		UBE2V2	0.480897			UBE2V2	0.247394	STX7	0.143831
VTI1B	0.125		VTI1B	0.09375		VTI1B	0.606027			VTI1B	0.253683	STX8	0.143598

## Sheet: UC
	DEGREE	0.2		BOTTLE	0.5		LATORA	0.3			COMBINED		SORTED VALUES
BET1	0.6875		BET1	0		BET1	0.689727			BET1	0.344418	IL2	1
CABIN1	0.3125		CABIN1	0.125		CABIN1	0.758602			CABIN1	0.352581	STX3	0.92294
CD80	0.6875		CD80	0.09375		CD80	0.901768			CD80	0.454905	NFATC2	0.643372
CD86	0.625		CD86	0.03125		CD86	0.813035			CD86	0.384536	JUN	0.621821
CTLA4	0.5625		CTLA4	0.0625		CTLA4	0.724121			CTLA4	0.360986	CD80	0.454905
FAS	0.625		FAS	0.03125		FAS	0.882056			FAS	0.405242	IL4	0.448748
FASLG	0.75		FASLG	0		FASLG	0.805503			FASLG	0.391651	MAPK8	0.426563
FOS	0.625		FOS	0.0625		FOS	0.686396			FOS	0.362169	FAS	0.405242
FOXP3	0.75		FOXP3	0.03125		FOXP3	0.774946			FOXP3	0.398109	FOXP3	0.398109
GOSR1	0.6875		GOSR1	0		GOSR1	0.636247			GOSR1	0.328374	IL2RA	0.393392
IL2	1		IL2	1		IL2	1			IL2	1	FASLG	0.391651
IL2RA	0.75		IL2RA	0		IL2RA	0.811306			IL2RA	0.393392	CD86	0.384536
IL4	0.875		IL4	0.09375		IL4	0.756245			IL4	0.448748	FOS	0.362169
IRF4	0.375		IRF4	0		IRF4	0.860251			IRF4	0.333075	CTLA4	0.360986
JUN	1		JUN	0.3125		JUN	0.885237			JUN	0.621821	CABIN1	0.352581
JUNB	0.4375		JUNB	0.03125		JUNB	0.647399			JUNB	0.297345	STX12	0.346634
JUND	0.25		JUND	0.0625		JUND	0.518859			JUND	0.236908	BET1	0.344418
MAPK8	0.75		MAPK8	0.09375		MAPK8	0.765628			MAPK8	0.426563	NAPG	0.34385
MEF2D	0.25		MEF2D	0		MEF2D	0.556203			MEF2D	0.216861	VTI1A	0.337523
NAPG	0.6875		NAPG	0		NAPG	0.687834			NAPG	0.34385	VTI1B	0.333899
NFATC2	1		NFATC2	0.40625		NFATC2	0.800822			NFATC2	0.643372	IRF4	0.333075
NKX2-3	0.0625		NKX2-3	0.03125		NKX2-3	0.611258			NKX2-3	0.211502	STX7	0.329551
PPP3CA	0.3125		PPP3CA	0		PPP3CA	0.653572			PPP3CA	0.258572	STX8	0.328737
PPP3R1	0.1875		PPP3R1	0.09375		PPP3R1	0.610829			PPP3R1	0.267624	GOSR1	0.328374
STX12	0.6875		STX12	0		STX12	0.697113			STX12	0.346634	STX5	0.326383
STX3	0.75		STX3	1		STX3	0.9098			STX3	0.92294	YKT6	0.326312
STX5	0.6875		STX5	0		STX5	0.62961			STX5	0.326383	STX6	0.326155
STX6	0.6875		STX6	0		STX6	0.628848			STX6	0.326155	JUNB	0.297345
STX7	0.6875		STX7	0		STX7	0.64017			STX7	0.329551	PPP3R1	0.267624
STX8	0.6875		STX8	0		STX8	0.637457			STX8	0.328737	PPP3CA	0.258572
VTI1A	0.6875		VTI1A	0		VTI1A	0.666744			VTI1A	0.337523	JUND	0.236908
VTI1B	0.6875		VTI1B	0		VTI1B	0.654664			VTI1B	0.333899	MEF2D	0.216861
YKT6	0.6875		YKT6	0		YKT6	0.629372			YKT6	0.326312	NKX2-3	0.211502

## Sheet: B1
	DEGREE	0.2		BOTTLE	0.5		LATORA	0.3			COMBINED		SORTED VALUES
BIRC2	0.75		BIRC2	0		BIRC2	0.803709			BIRC2	0.391113	TLR4	1
BIRC3	0.75		BIRC3	0.16129		BIRC3	0.82002			BIRC3	0.476651	PRPF8	0.93567
FXN	0.0625		FXN	0		FXN	0.0336669			FXN	0.0226001	SNRPF	0.934003
HMGB1	0.25		HMGB1	0.0967742		HMGB1	0.597836			HMGB1	0.277738	MYD88	0.529994
IKBKG	0.75		IKBKG	0.0645161		IKBKG	0.750935			IKBKG	0.407538	TRAF6	0.504367
LSM10	0.8125		LSM10	0		LSM10	0.747502			LSM10	0.386751	NOD2	0.495093
LSM3	0.8125		LSM3	0.16129		LSM3	0.697515			LSM3	0.4524	BIRC3	0.476651
LSM6	0.8125		LSM6	0		LSM6	0.697699			LSM6	0.37181	LY96	0.476316
LSM7	0.8125		LSM7	0		LSM7	0.69896			LSM7	0.372188	SNRPC	0.455312
LY96	0.875		LY96	0.0967742		LY96	0.843097			LY96	0.476316	UBE2V1	0.452925
LYRM4	0.0625		LYRM4	0.0322581		LYRM4	0.0336669			LYRM4	0.0387291	LSM3	0.4524
MAP3K7	0.8125		MAP3K7	0.0322581		MAP3K7	0.806903			MAP3K7	0.4207	SNRNP70	0.42408
MYD88	0.875		MYD88	0.225806		MYD88	0.80697			MYD88	0.529994	MAP3K7	0.4207
NKX2-3	0.0625		NKX2-3	0.0967742		NKX2-3	0.672585			NKX2-3	0.262662	UBE2N	0.415453
NOD2	0.8125		NOD2	0.0967742		NOD2	0.947354			NOD2	0.495093	IKBKG	0.407538
PRPF8	0.875		PRPF8	0.967742		PRPF8	0.922663			PRPF8	0.93567	TICAM1	0.396889
SLC22A4	0.0625		SLC22A4	0		SLC22A4	0.680884			SLC22A4	0.216765	BIRC2	0.391113
SNRNP70	0.8125		SNRNP70	0.0967742		SNRNP70	0.710644			SNRNP70	0.42408	LSM10	0.386751
SNRPB	0.8125		SNRPB	0		SNRPB	0.690592			SNRPB	0.369678	SNRPD1	0.376546
SNRPC	0.8125		SNRPC	0.16129		SNRPC	0.707223			SNRPC	0.455312	LSM7	0.372188
SNRPD1	0.8125		SNRPD1	0		SNRPD1	0.713486			SNRPD1	0.376546	LSM6	0.37181
SNRPD2	0.8125		SNRPD2	0		SNRPD2	0.690661			SNRPD2	0.369698	SNRPG	0.369793
SNRPD3	0.8125		SNRPD3	0		SNRPD3	0.690254			SNRPD3	0.369576	SNRPD2	0.369698
SNRPE	0.8125		SNRPE	0		SNRPE	0.69012			SNRPE	0.369536	SNRPB	0.369678
SNRPF	0.875		SNRPF	0.967742		SNRPF	0.917108			SNRPF	0.934003	SNRPD3	0.369576
SNRPG	0.8125		SNRPG	0		SNRPG	0.690976			SNRPG	0.369793	SNRPE	0.369536
STX7	0.125		STX7	0.0645161		STX7	0.0671652			STX7	0.0774076	TRAF3	0.367069
STX8	0.125		STX8	0		STX8	0.0669965			STX8	0.045099	TIRAP	0.357112
TICAM1	0.75		TICAM1	0.0322581		TICAM1	0.7692			TICAM1	0.396889	HMGB1	0.277738
TIRAP	0.5		TIRAP	0.0322581		TIRAP	0.803277			TIRAP	0.357112	NKX2-3	0.262662
TLR4	1		TLR4	1		TLR4	1			TLR4	1	SLC22A4	0.216765
TRAF3	0.625		TRAF3	0.0322581		TRAF3	0.753133			TRAF3	0.367069	UBE2V2	0.185317
TRAF6	0.8125		TRAF6	0.225806		TRAF6	0.763211			TRAF6	0.504367	STX7	0.0774076
UBE2N	0.8125		UBE2N	0.0322581		UBE2N	0.789412			UBE2N	0.415453	VTI1B	0.0612786
UBE2V1	0.75		UBE2V1	0.0967742		UBE2V1	0.848458			UBE2V1	0.452925	STX8	0.045099
UBE2V2	0.125		UBE2V2	0.0322581		UBE2V2	0.480628			UBE2V2	0.185317	LYRM4	0.0387291
VTI1B	0.125		VTI1B	0.0322581		VTI1B	0.0671652			VTI1B	0.0612786	FXN	0.0226001

## Sheet: B2
	DEGREE	0.2		BOTTLE	0.5		LATORA	0.3			COMBINED		SORTED VALUES
ADIPOQ	0.764706		ADIPOQ	0.1		ADIPOQ	0.820054			ADIPOQ	0.448957	ATG12	0.896764
AR	0.529412		AR	0.8		AR	0.778915			AR	0.739557	ATG4B	0.887386
ATG10	0.882353		ATG10	0		ATG10	0.865271			ATG10	0.436052	PIK3R4	0.758726
ATG12	0.882353		ATG12	1		ATG12	0.734313			ATG12	0.896764	ATG3	0.747217
ATG14	0.882353		ATG14	0		ATG14	1			ATG14	0.476471	AR	0.739557
ATG16L1	1		ATG16L1	0.2		ATG16L1	0.898502			ATG16L1	0.56955	GABARAP	0.712273
ATG3	0.882353		ATG3	0.7		ATG3	0.735822			ATG3	0.747217	ATG7	0.70081
ATG4B	0.882353		ATG4B	0.9		ATG4B	0.869717			ATG4B	0.887386	ATG5	0.695569
ATG5	0.882353		ATG5	0.6		ATG5	0.730327			ATG5	0.695569	LEP	0.688226
ATG7	0.882353		ATG7	0.6		ATG7	0.747799			ATG7	0.70081	NCOA1	0.609564
BECN1	0.882353		BECN1	0.4		BECN1	0.726419			BECN1	0.594396	PIK3C3	0.605092
CD36	0.647059		CD36	0		CD36	0.768592			CD36	0.359989	BECN1	0.594396
CHUK	0.294118		CHUK	0.4		CHUK	0.626762			CHUK	0.446852	ATG16L1	0.56955
FABP4	0.588235		FABP4	0		FABP4	0.663915			FABP4	0.316822	IKBKB	0.542361
FAM92B	0.0588235		FAM92B	0		FAM92B	0.634637			FAM92B	0.202156	NCOA2	0.533966
GABARAP	0.882353		GABARAP	0.6		GABARAP	0.786007			GABARAP	0.712273	ATG14	0.476471
GABARAPL1	0.882353		GABARAPL1	0		GABARAPL1	0.75694			GABARAPL1	0.403553	ADIPOQ	0.448957
GABARAPL2	0.882353		GABARAPL2	0		GABARAPL2	0.755374			GABARAPL2	0.403083	CHUK	0.446852
IKBKB	0.411765		IKBKB	0.4		IKBKB	0.866695			IKBKB	0.542361	ATG10	0.436052
LEP	0.764706		LEP	0.5		LEP	0.950949			LEP	0.688226	PPARG	0.435278
LPL	0.647059		LPL	0		LPL	0.662755			LPL	0.328238	NFKB1	0.427789
MAP1LC3B	0.882353		MAP1LC3B	0		MAP1LC3B	0.787614			MAP1LC3B	0.412755	NCOR2	0.425487
NCOA1	0.764706		NCOA1	0.5		NCOA1	0.688743			NCOA1	0.609564	MAP1LC3B	0.412755
NCOA2	0.705882		NCOA2	0.4		NCOA2	0.64263			NCOA2	0.533966	WIPI2	0.41194
NCOR1	0.764706		NCOR1	0		NCOR1	0.741204			NCOR1	0.375302	GABARAPL1	0.403553
NCOR2	0.882353		NCOR2	0		NCOR2	0.830054			NCOR2	0.425487	GABARAPL2	0.403083
NFKB1	0.705882		NFKB1	0		NFKB1	0.955374			NFKB1	0.427789	NCOR1	0.375302
NKX2-3	0.0588235		NKX2-3	0		NKX2-3	0.618192			NKX2-3	0.197222	CD36	0.359989
NR3C1	0.647059		NR3C1	0		NR3C1	0.743093			NR3C1	0.35234	NR3C1	0.35234
PIK3C3	0.882353		PIK3C3	0.4		PIK3C3	0.76207			PIK3C3	0.605092	PPARGC1A	0.351468
PIK3R4	0.882353		PIK3R4	0.7		PIK3R4	0.774184			PIK3R4	0.758726	LPL	0.328238
PPARG	0.764706		PPARG	0.1		PPARG	0.774455			PPARG	0.435278	FABP4	0.316822
PPARGC1A	0.705882		PPARGC1A	0		PPARGC1A	0.700973			PPARGC1A	0.351468	FAM92B	0.202156
WIPI2	0.882353		WIPI2	0		WIPI2	0.784899			WIPI2	0.41194	NKX2-3	0.197222

## Sheet: E1
	DEGREE	0.2		BOTTLE	0.5		LATORA	0.3				COMBINED		SORTED VALUES
ARHGDIB	0.08		ARHGDIB	0.037037		ARHGDIB	0.419693				ARHGDIB	0.160426	TLR4	0.986033
BIRC2	0.84		BIRC2	0.518519		BIRC2	0.833557				BIRC2	0.677326	NFKB1	0.949515
CHUK	0.88		CHUK	0.222222		CHUK	0.735787				CHUK	0.507847	TNF	0.936669
CYBA	0.32		CYBA	0.148148		CYBA	0.665613				CYBA	0.337758	RAC1	0.79981
CYBB	0.4		CYBB	0.148148		CYBB	0.760731				CYBB	0.382293	TNFRSF1A	0.71303
CYLD	0.72		CYLD	0.296296		CYLD	0.802686				CYLD	0.532954	BIRC2	0.677326
DDX58	0.68		DDX58	0.259259		DDX58	0.867486				DDX58	0.525876	MYD88	0.675832
IKBKB	0.84		IKBKB	0.222222		IKBKB	0.692481				IKBKB	0.486855	UBC	0.647847
IKBKG	0.84		IKBKG	0.222222		IKBKG	0.679488				IKBKG	0.482957	IRAK1	0.587361
IRAK1	0.72		IRAK1	0.333333		IRAK1	0.922315				IRAK1	0.587361	RIPK2	0.58163
MAP3K7	0.72		MAP3K7	0.259259		MAP3K7	0.685329				MAP3K7	0.479228	TRAF2	0.559041
MAVS	0.64		MAVS	0.296296		MAVS	0.94094				MAVS	0.55843	MAVS	0.55843
MYD88	0.8		MYD88	0.518519		MYD88	0.855242				MYD88	0.675832	RIPK1	0.558381
NCF1	0.36		NCF1	0.037037		NCF1	0.729813				NCF1	0.309462	TRAF6	0.553078
NCF2	0.28		NCF2	0.148148		NCF2	0.638987				NCF2	0.32177	CYLD	0.532954
NCF4	0.24		NCF4	0.555556		NCF4	0.484002				NCF4	0.470979	RNF31	0.531401
NFKB1	1		NFKB1	0.925926		NFKB1	0.955172				NFKB1	0.949515	DDX58	0.525876
NFKB2	0.6		NFKB2	0.259259		NFKB2	0.885406				NFKB2	0.515251	NFKB2	0.515251
RAC1	0.52		RAC1	0.888889		RAC1	0.837884				RAC1	0.79981	CHUK	0.507847
RAC2	0.36		RAC2	0.111111		RAC2	0.692333				RAC2	0.335256	STAT1	0.49582
RIPK1	0.88		RIPK1	0.296296		RIPK1	0.780777				RIPK1	0.558381	TICAM1	0.493268
RIPK2	0.76		RIPK2	0.259259		RIPK2	1				RIPK2	0.58163	IKBKB	0.486855
RNF31	0.56		RNF31	0.333333		RNF31	0.842447				RNF31	0.531401	IKBKG	0.482957
STAT1	0.52		STAT1	0.296296		STAT1	0.812241				STAT1	0.49582	MAP3K7	0.479228
TICAM1	0.56		TICAM1	0.296296		TICAM1	0.777067				TICAM1	0.493268	NCF4	0.470979
TLR4	1		TLR4	1		TLR4	0.953444				TLR4	0.986033	TNFRSF1B	0.456993
TNF	1		TNF	0.925926		TNF	0.912353				TNF	0.936669	CYBB	0.382293
TNFRSF1A	0.88		TNFRSF1A	0.555556		TNFRSF1A	0.864174				TNFRSF1A	0.71303	CYBA	0.337758
TNFRSF1B	0.4		TNFRSF1B	0.296296		TNFRSF1B	0.762816				TNFRSF1B	0.456993	RAC2	0.335256
TRAF2	0.76		TRAF2	0.37037		TRAF2	0.739519				TRAF2	0.559041	NCF2	0.32177
TRAF6	0.92		TRAF6	0.259259		TRAF6	0.798162				TRAF6	0.553078	NCF1	0.309462
UBC	0.8		UBC	0.481481		UBC	0.823686				UBC	0.647847	ARHGDIB	0.160426

## Sheet: E3
	DEGREE	0.2		BOTTLE	0.5		LATORA	0.3			COMBINED		SORTED VALUES
CD80	0.666667		CD80	0.137931		CD80	0.949244			CD80	0.487072	IL2	0.986667
CD86	0.6		CD86	0.0344828		CD86	0.850076			CD86	0.392264	STX3	0.927912
CTLA4	0.533333		CTLA4	0.0344828		CTLA4	0.733594			CTLA4	0.343986	FASLG	0.636115
FAF1	0.266667		FAF1	0.206897		FAF1	0.60041			FAF1	0.336905	NFATC2	0.62921
FASLG	0.8		FASLG	0.413793		FASLG	0.897396			FASLG	0.636115	JUN	0.619512
FOS	0.666667		FOS	0.0689655		FOS	0.743498			FOS	0.390866	CD80	0.487072
FOXP3	0.733333		FOXP3	0.0689655		FOXP3	0.785938			FOXP3	0.416931	IL4	0.466346
GOSR1	0.666667		GOSR1	0		GOSR1	0.679231			GOSR1	0.337103	MAPK8	0.457847
IL2	0.933333		IL2	1		IL2	1			IL2	0.986667	STX5	0.430851
IL2RA	0.733333		IL2RA	0		IL2RA	0.841982			IL2RA	0.399261	FOXP3	0.416931
IL4	0.866667		IL4	0.103448		IL4	0.804296			IL4	0.466346	IL2RA	0.399261
IRF4	0.4		IRF4	0		IRF4	0.899821			IRF4	0.349946	CD86	0.392264
JUN	1		JUN	0.275862		JUN	0.938604			JUN	0.619512	FOS	0.390866
JUNB	0.466667		JUNB	0.0344828		JUNB	0.693045			JUNB	0.318488	NAPG	0.352261
JUND	0.266667		JUND	0.0344828		JUND	0.561103			JUND	0.238906	STX12	0.351983
MAPK8	0.733333		MAPK8	0.137931		MAPK8	0.807383			MAPK8	0.457847	IRF4	0.349946
MEF2D	0.2		MEF2D	0		MEF2D	0.550881			MEF2D	0.205264	CTLA4	0.343986
NAPG	0.666667		NAPG	0		NAPG	0.729758			NAPG	0.352261	VTI1A	0.34367
NFATC2	1		NFATC2	0.344828		NFATC2	0.855987			NFATC2	0.62921	VTI1B	0.341596
NKX2-3	0.0666667		NKX2-3	0.0344828		NKX2-3	0.659208			NKX2-3	0.228337	GOSR1	0.337103
NPLOC4	0.2		NPLOC4	0		NPLOC4	0.478592			NPLOC4	0.183578	FAF1	0.336905
PPP3CA	0.266667		PPP3CA	0		PPP3CA	0.684129			PPP3CA	0.258572	STX7	0.336851
PPP3R1	0.133333		PPP3R1	0.0689655		PPP3R1	0.508606			PPP3R1	0.213731	STX8	0.336121
STX12	0.666667		STX12	0		STX12	0.728833			STX12	0.351983	YKT6	0.334876
STX3	0.733333		STX3	1		STX3	0.937484			STX3	0.927912	STX6	0.333262
STX5	0.733333		STX5	0.137931		STX5	0.717394			STX5	0.430851	JUNB	0.318488
STX6	0.666667		STX6	0		STX6	0.66643			STX6	0.333262	VCP	0.274548
STX7	0.666667		STX7	0		STX7	0.678392			STX7	0.336851	PPP3CA	0.258572
STX8	0.666667		STX8	0		STX8	0.675958			STX8	0.336121	JUND	0.238906
UFD1L	0.2		UFD1L	0		UFD1L	0.47951			UFD1L	0.183853	NKX2-3	0.228337
VCP	0.266667		VCP	0.103448		VCP	0.564968			VCP	0.274548	PPP3R1	0.213731
VTI1A	0.666667		VTI1A	0		VTI1A	0.701121			VTI1A	0.34367	MEF2D	0.205264
VTI1B	0.666667		VTI1B	0		VTI1B	0.694209			VTI1B	0.341596	UFD1L	0.183853
YKT6	0.666667		YKT6	0		YKT6	0.671809			YKT6	0.334876	NPLOC4	0.183578
